# Supplementary material for: Room temperature and rapid synthesis of two-dimensional bimetallic NiCo-CAT MOFs by an electrochemical strategy for enhancing electrocatalytic oxygen evolution reaction
Source: Royal Society of Chemistry journal article supplement (doi:10.1039/d4ce00383g), 2024-01-01
Supplement: d4ce00383g1.pdf [file d4ce00383g1.pdf]

## Supplementary information

### **Room Temperature and Rapid Synthesis of Two-Dimensional Bimetallic NiCo-CAT MOF by an Electrochemical strategy for Enhancing Electrocatalytic Oxygen Evolution Reaction**

Wan-Ru Yan, Yu Xue, Mei-Chen Liu, Xiu Qiao, Chang-Yi Jing, Yue Yu, Xiao-Chun Yan, Jin-Zhi Wei,  
Hong Dong\* and Feng-Ming Zhang

Heilongjiang Provincial Key Laboratory of CO<sub>2</sub> Resource Utilization and Energy Catalytic Materials,  
School of Material Science and Chemical Engineering, Harbin University of Science and  
Technology, Harbin, 150040, P. R. China.

\*Corresponding Author

E-mail: dongh92@163.com

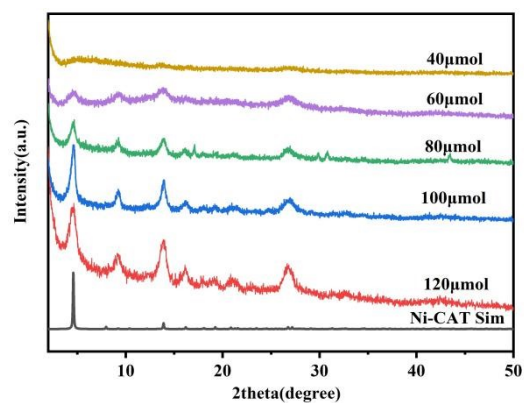

**Figure S1.** XRD patterns of Ni-CAT materials synthesized with different amounts of ligand.

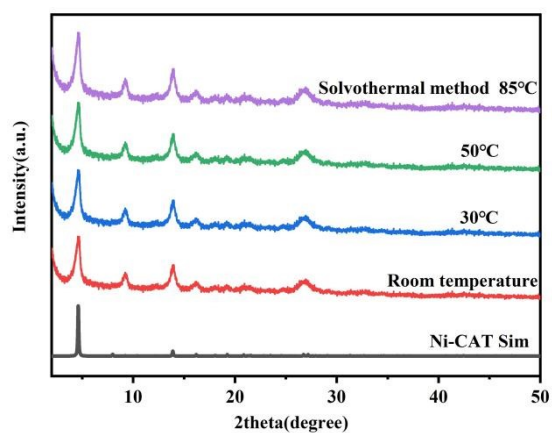

**Figure S2.** XRD patterns of Ni-CAT materials synthesized at different temperatures.

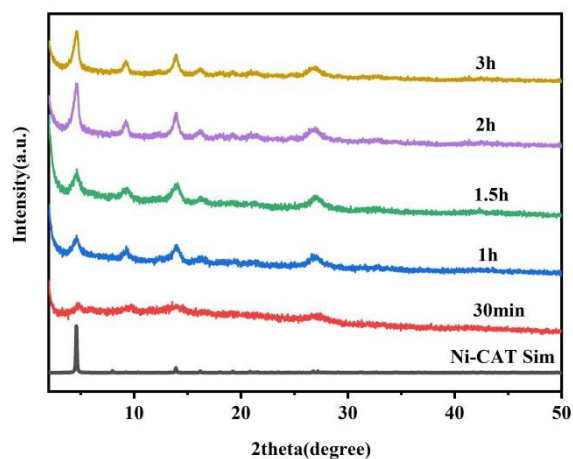

**Figure S3.** XRD patterns of Ni-CAT materials synthesized with different reaction times.

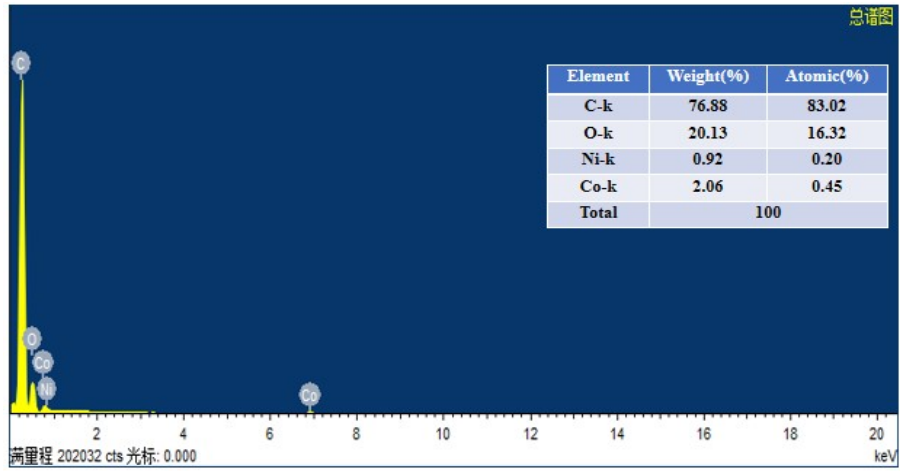

Figure S4. EDS results for NiCo-CAT.

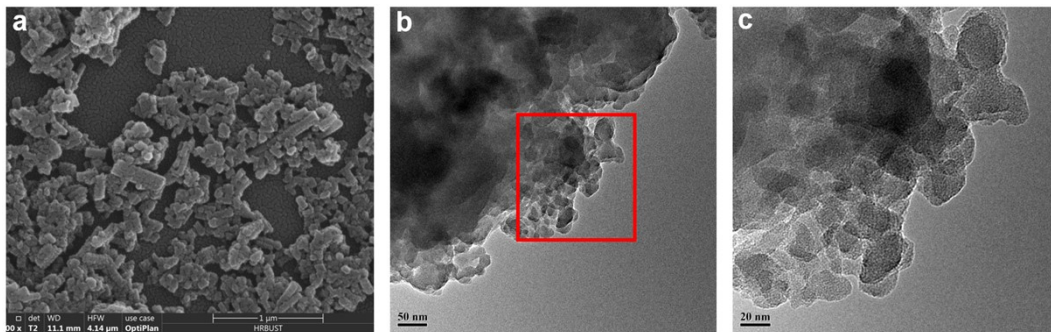

Figure S5. SEM (a) and TEM (b-c) images for NiCo-CAT.

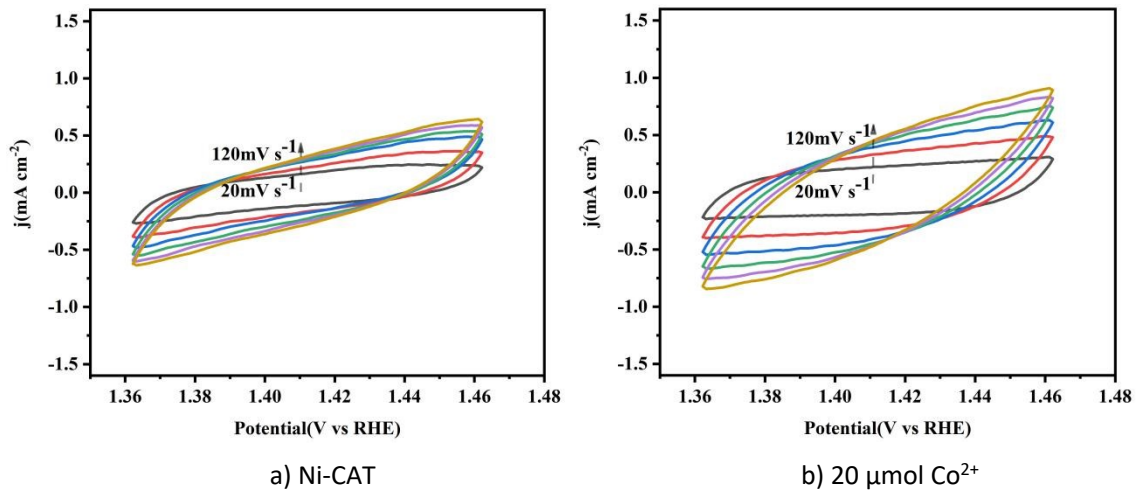

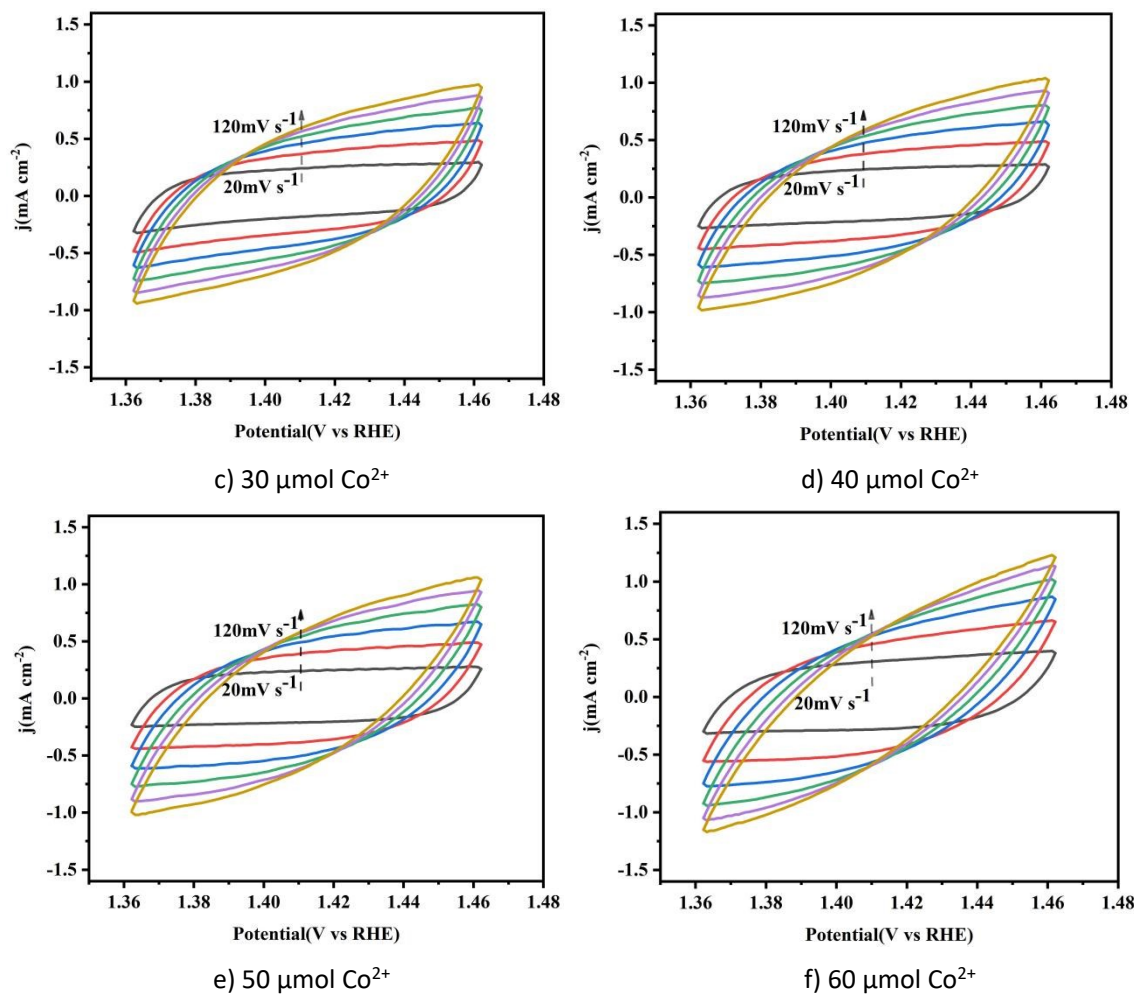

**Figure S6.** a-f) CV maps of Ni-CAT and NiCo-CAT with different metal  $\text{Co}^{2+}$  dosages at different scanning rates (20, 40, 60, 80, 100 and 120  $\text{mV s}^{-1}$ )

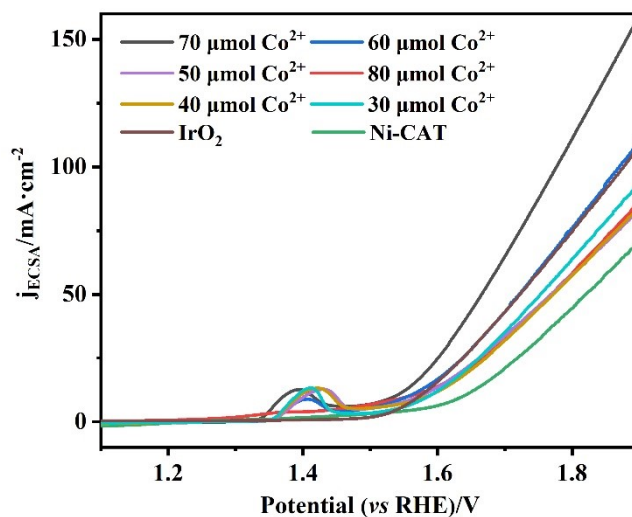

**Figure S7.** LSV curves of NiCo-CAT with different  $\text{Co}^{2+}$  dosages normalized by the calculated ECSA values.

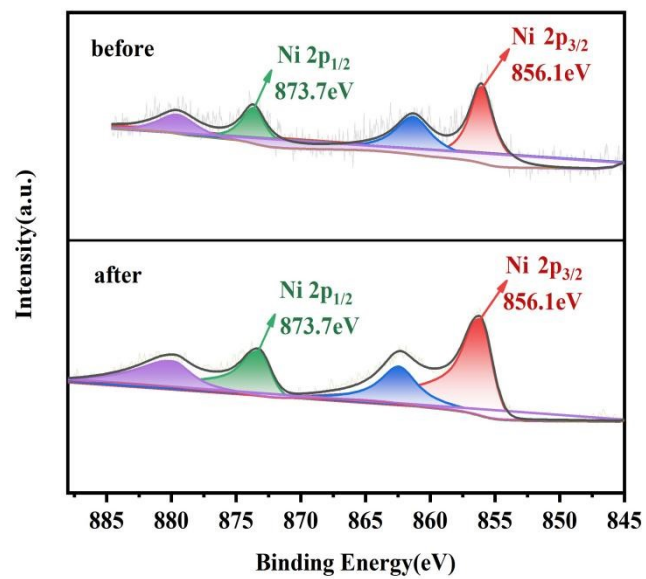

Figure S8. XPS high resolution spectra of Ni 2p before and after OER reaction.

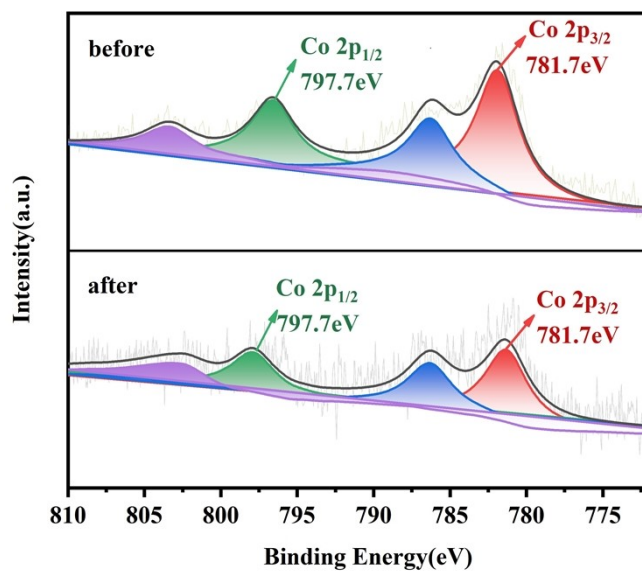

Figure S9. XPS high resolution spectra of Co 2p before and after OER reaction.

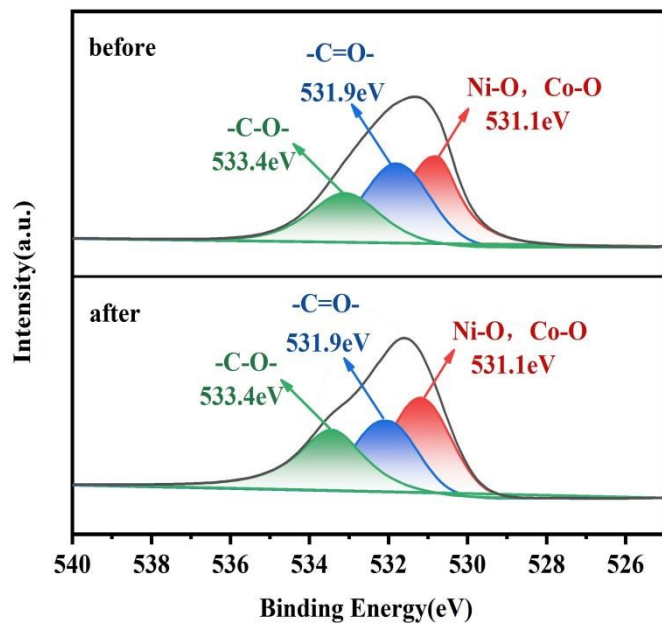

**Figure S10.** XPS high resolution spectra of O 1s before and after OER reaction.

**Table S1.** Comparison of OER performance for electrocatalysts in this work and some other recently reported bi-metallic MOFs-based electrocatalysts.

| Catalysts                                     | $\eta_{10}$ (mV)            | Substrate | Ref.                                        |
|-----------------------------------------------|-----------------------------|-----------|---------------------------------------------|
| NiCo-CAT                                      | 307                         | CC        | This work                                   |
| NH <sub>2</sub> -CoFe MOF                     | 358@200 mA cm <sup>-2</sup> | NF        | CrystEngComm, 2023,25, 5387-5398            |
| MoS <sub>2</sub> @Fe/Ni-MOF <sub>600</sub> -3 | 340                         | NF        | Fuel, 2023, 339, 127395                     |
| Fe(py) <sub>2</sub> Ni(CN) <sub>4</sub>       | 285                         | GC        | Inorg. Chem. 2022, 61, 18, 7095–7102        |
| Co-Fe/Ni@HPA-MOF                              | 320                         | GC        | J. Solid State Chem. 2019, 272, 32-37       |
| CoFe-MOF                                      | 355                         | GC        | Catal. Sci. Technol. 2020, 10, 3897-3903.   |
| NNU-23                                        | 365                         | CC        | Angew. Chem., Int. Ed. 2018, 57, 9660-9664  |
| MAF-X27-OH                                    | 292                         | Cu Foil   | J. Am. Chem. Soc. 2016, 138, 8336-8339.     |
| NiCo-UMOFNs                                   | 250                         | GC        | Nat. Energy 2016, 1, 1-10.                  |
| Fe <sub>3</sub> -Co <sub>2</sub> @GC          | 283                         | GC        | J. Am. Chem. Soc. 2017, 139, 1778-1781.     |
| Co:Fe <sub>3</sub> @GC                        | 453                         | GC        | J. Am. Chem. Soc. 2017, 139, 1778-1781      |
| Co-10Ni-B-sp                                  | 310                         | GC        | Nanoscale 2018, 10, 11997-12002.            |
| Co-B/ZIF-67                                   | 320                         | GC        | Electrochem. Commun. 2018, 86, 140-144      |
| NiFe-NHCNPs                                   | 350                         | CP        | Chem. - Asian J. 2018, 13, 3274-3280.       |
| CoFe-PYZ                                      | 300                         | GC        | ACS Appl. Energy Mater. 2018, 1, 5140-5144. |
| Co-WOC-1                                      | 390@1 mA cm <sup>-2</sup>   | GC        | Angew. Chem., Int. Ed. 2016, 55, 2425-2430. |

NF: nickel foam, GC: glassy carbon, CC: carbon cloth, CP: carbon paper.
